# Supplementary material for: A novel precursor towards buffer layer materials: the first solution based CVD of zinc oxysulfide
Source: Royal Society of Chemistry journal article supplement (doi:10.1039/d0tc00840k), 2020-01-01

## A novel precursor towards buffer layer materials: the first solution based CVD of zinc oxysulfide

Malavika A. Bhide, Claire J. Carmalt and Caroline E. Knapp\*

### Electronic Supplementary Information (ESI)

#### Table of contents

|                                                                                |    |
|--------------------------------------------------------------------------------|----|
| S1. <sup>1</sup> H NMR spectrum of <b>1</b>                                    | 1  |
| S2. Crystallographic information for <b>1</b>                                  | 2  |
| S3. TGA of <b>1</b>                                                            | 8  |
| S4. AACVD of Zn(O,S) using alternative known precursors                        | 8  |
| S5. XRD pattern of ZnS deposited from <b>1</b>                                 | 9  |
| S6. XPS (300 s etch): O 1s spectrum of ZnO <sub>0.884</sub> S <sub>0.116</sub> | 9  |
| S7. XRD patterns of large area film                                            | 10 |
| S8. EDAX raw data of large area film                                           | 11 |
| S9. UV/vis transmittance spectra of large area film                            | 12 |

S1. <sup>1</sup>H NMR spectrum of **1**.

Red asterisks denote residual solvents.

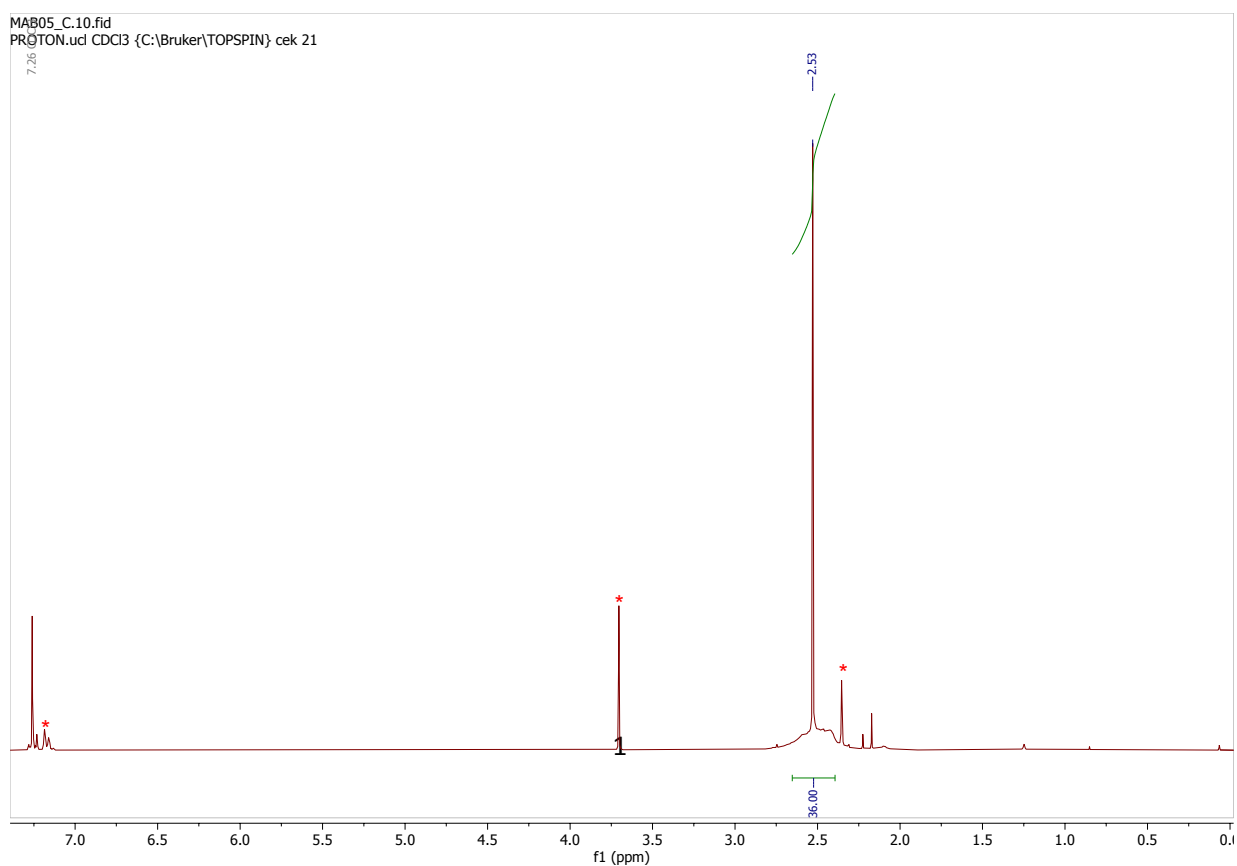

## S2. Crystallographic information for **1**

Table 1 Crystal data and structure refinement for **1**.

|                                             |                                                                                 |
|---------------------------------------------|---------------------------------------------------------------------------------|
| Identification code                         | xstr0983                                                                        |
| Empirical formula                           | C <sub>24</sub> H <sub>36</sub> O <sub>12</sub> S <sub>14</sub> Zn <sub>8</sub> |
| Formula weight                              | 1488.33                                                                         |
| Temperature/K                               | 150.00(10)                                                                      |
| Crystal system                              | monoclinic                                                                      |
| Space group                                 | C2/c                                                                            |
| a/Å                                         | 22.8318(2)                                                                      |
| b/Å                                         | 22.2511(2)                                                                      |
| c/Å                                         | 12.24570(10)                                                                    |
| α/°                                         | 90                                                                              |
| β/°                                         | 102.3260(10)                                                                    |
| γ/°                                         | 90                                                                              |
| Volume/Å <sup>3</sup>                       | 6077.81(9)                                                                      |
| Z                                           | 4                                                                               |
| ρ <sub>calc</sub> /cm <sup>3</sup>          | 1.627                                                                           |
| μ/mm <sup>-1</sup>                          | 8.275                                                                           |
| F(000)                                      | 2960.0                                                                          |
| Crystal size/mm <sup>3</sup>                | 0.12 × 0.1 × 0.04                                                               |
| Radiation                                   | Cu Kα (λ = 1.54184)                                                             |
| 2θ range for data collection/°              | 7.928 to 152.744                                                                |
| Index ranges                                | -28 ≤ h ≤ 28, -27 ≤ k ≤ 27, -15 ≤ l ≤ 15                                        |
| Reflections collected                       | 62293                                                                           |
| Independent reflections                     | 6355 [R <sub>int</sub> = 0.0478, R <sub>sigma</sub> = 0.0188]                   |
| Data/restraints/parameters                  | 6355/0/313                                                                      |
| Goodness-of-fit on F <sup>2</sup>           | 1.022                                                                           |
| Final R indexes [I ≥ 2σ (I)]                | R <sub>1</sub> = 0.0290, wR <sub>2</sub> = 0.0783                               |
| Final R indexes [all data]                  | R <sub>1</sub> = 0.0311, wR <sub>2</sub> = 0.0807                               |
| Largest diff. peak/hole / e Å <sup>-3</sup> | 0.82/-0.68                                                                      |

Table 2 Fractional Atomic Coordinates (×10<sup>4</sup>) and Equivalent Isotropic Displacement Parameters (Å<sup>2</sup>×10<sup>3</sup>) for xstr0983. U<sub>eq</sub> is defined as 1/3 of of the trace of the orthogonalised U<sub>ij</sub> tensor.

| Atom | x          | y          | z         | U(eq)     |
|------|------------|------------|-----------|-----------|
| Zn01 | 7124.7(2)  | 7789.0(2)  | 7144.6(2) | 34.74(8)  |
| Zn02 | 6535.4(2)  | 6656.9(2)  | 4604.7(2) | 33.53(8)  |
| Zn03 | 6776.0(2)  | 8488.7(2)  | 3585.1(2) | 35.25(8)  |
| Zn04 | 6931.2(2)  | 6287.8(2)  | 7258.4(2) | 36.32(8)  |
| S005 | 7275.3(2)  | 6953.6(2)  | 6109.2(4) | 29.29(11) |
| S006 | 6739.0(3)  | 9331.8(3)  | 4661.9(5) | 45.68(14) |
| S007 | 5587.6(2)  | 7018.6(3)  | 4581.6(6) | 48.58(15) |
| S008 | 7120.8(3)  | 6970.8(3)  | 1339.3(5) | 48.80(15) |
| S009 | 6745.6(4)  | 5317.9(3)  | 6622.7(6) | 58.43(19) |
| S00A | 8672.8(3)  | 6366.1(5)  | 8276.4(5) | 63.1(2)   |
| S00B | 6141.5(15) | 6597.1(13) | 8098(2)   | 46.6(13)  |

|      |            |            |            |          |
|------|------------|------------|------------|----------|
| O00C | 6875.2(7)  | 6739.2(8)  | 3246.6(13) | 38.6(3)  |
| O00D | 6827.8(7)  | 8422.7(7)  | 6001.7(14) | 39.5(3)  |
| O00E | 6536.3(8)  | 5759.5(8)  | 4568.8(14) | 47.2(4)  |
| O00F | 6266.7(7)  | 7793.7(8)  | 3915.2(14) | 40.9(3)  |
| O00G | 6122(7)    | 7698(3)    | 7587(6)    | 23(3)    |
| O00H | 7596.1(8)  | 6138.3(10) | 8610.9(16) | 54.4(5)  |
| C00I | 6612.7(10) | 5322.2(11) | 5198(2)    | 41.2(5)  |
| C00J | 8134.5(11) | 6177.6(10) | 8984.1(19) | 38.7(5)  |
| C00K | 6674.8(11) | 6736.4(12) | 2214(2)    | 42.6(5)  |
| C00L | 6844.5(11) | 8976.7(11) | 5932(2)    | 40.6(5)  |
| C00M | 5780.6(10) | 7715.2(12) | 4180(2)    | 44.0(5)  |
| C00N | 8350.3(14) | 6048.7(14) | 10213(2)   | 53.0(6)  |
| C00O | 6586.1(16) | 4718.9(13) | 4651(2)    | 57.1(7)  |
| C00P | 6099(5)    | 7377(4)    | 8178(9)    | 31(3)    |
| C00Q | 6959(2)    | 9359.9(15) | 6956(3)    | 80.0(12) |
| C00R | 6057.7(14) | 6515(2)    | 1748(3)    | 77.3(11) |
| C00S | 5359.8(15) | 8231.1(18) | 4196(5)    | 92.8(15) |
| C00T | 5645.9(18) | 7597.7(19) | 8785(4)    | 58.8(13) |
| C1   | 5546(7)    | 6911(8)    | 8688(14)   | 80(6)    |
| S2   | 6320(30)   | 6552(7)    | 8043(15)   | 99(6)    |
| O3   | 6386(8)    | 7727.8(14) | 7779(7)    | 53(2)    |
| C4   | 6086(6)    | 7120(30)   | 8122(11)   | 107(14)  |

Table 3 Anisotropic Displacement Parameters ( $\text{\AA}^2 \times 10^3$ ) for xstr0983. The Anisotropic displacement factor exponent takes the form:  $-2\pi^2[h^2a^*2U_{11}+2hka^*b^*U_{12}+\dots]$ .

| Atom | $U_{11}$  | $U_{22}$  | $U_{33}$  | $U_{23}$  | $U_{13}$  | $U_{12}$  |
|------|-----------|-----------|-----------|-----------|-----------|-----------|
| Zn01 | 41.12(16) | 36.23(16) | 28.90(14) | -0.93(11) | 12.02(11) | -2.10(11) |
| Zn02 | 27.73(14) | 40.91(16) | 31.51(15) | 0.38(11)  | 5.35(11)  | -3.54(10) |
| Zn03 | 30.51(15) | 44.97(17) | 31.43(15) | 3.65(12)  | 9.22(11)  | 1.02(11)  |
| Zn04 | 39.88(16) | 37.80(16) | 31.99(15) | 1.43(11)  | 9.26(12)  | -6.07(11) |
| S005 | 26.6(2)   | 35.0(2)   | 26.7(2)   | -0.93(18) | 6.70(17)  | -2.96(17) |
| S006 | 59.3(3)   | 38.4(3)   | 42.1(3)   | 6.2(2)    | 16.9(3)   | 5.4(2)    |
| S007 | 26.8(2)   | 58.0(4)   | 63.4(4)   | 9.9(3)    | 15.3(2)   | -3.5(2)   |
| S008 | 52.4(3)   | 68.4(4)   | 25.4(2)   | -4.2(2)   | 7.8(2)    | -0.8(3)   |
| S009 | 100.6(6)  | 39.5(3)   | 41.4(3)   | -3.2(2)   | 29.1(3)   | -11.3(3)  |
| S00A | 34.0(3)   | 117.6(7)  | 36.1(3)   | 13.3(3)   | 4.0(2)    | 0.6(3)    |
| S00B | 50.1(17)  | 40.4(15)  | 58.7(12)  | 5.0(7)    | 32.7(6)   | -0.3(8)   |
| O00C | 34.6(7)   | 49.9(9)   | 31.3(7)   | -2.8(6)   | 7.4(6)    | -3.8(6)   |
| O00D | 41.9(8)   | 38.2(8)   | 38.3(8)   | 3.9(6)    | 8.4(6)    | -0.5(6)   |
| O00E | 51.3(10)  | 46.6(10)  | 39.4(9)   | 2.7(7)    | 0.1(7)    | -3.5(7)   |
| O00F | 31.8(7)   | 48.3(9)   | 44.3(9)   | 0.9(7)    | 11.4(6)   | -3.0(6)   |
| O00G | 12(5)     | 21(2)     | 39(3)     | -4.4(17)  | 14(2)     | -0.3(17)  |
| O00H | 42.2(9)   | 69.2(12)  | 50.4(10)  | 20.1(9)   | 6.8(8)    | -9.3(8)   |
| C00I | 35.9(11)  | 41.4(12)  | 49.1(13)  | -6.9(10)  | 15.6(9)   | -4.5(9)   |
| C00J | 46.9(12)  | 36.5(11)  | 31.4(10)  | -1.9(8)   | 5.2(9)    | -0.5(9)   |

|      |          |          |          |           |          |           |
|------|----------|----------|----------|-----------|----------|-----------|
| C00K | 38.3(11) | 54.0(14) | 33.7(11) | -10.7(10) | 3.7(9)   | -1.3(10)  |
| C00L | 43.7(12) | 42.7(12) | 37.7(11) | 0.4(9)    | 13.6(9)  | 1.9(9)    |
| C00M | 26.6(10) | 57.6(14) | 47.8(13) | 8.5(11)   | 7.6(9)   | 2.3(9)    |
| C00N | 67.4(17) | 58.0(16) | 31.5(11) | -0.5(11)  | 5.7(11)  | -3.5(13)  |
| C00O | 80(2)    | 44.2(14) | 50.6(15) | -9.6(11)  | 20.9(14) | 0.7(13)   |
| C00P | 37(3)    | 25(7)    | 32(3)    | -4(2)     | 9(2)     | -2(2)     |
| C00Q | 146(4)   | 48.5(17) | 43.2(15) | -6.2(13)  | 15.9(19) | 6.1(19)   |
| C00R | 42.6(15) | 129(3)   | 55.3(18) | -19.9(19) | -1.2(13) | -14.8(18) |
| C00S | 45.6(17) | 74(2)    | 168(5)   | 38(3)     | 42(2)    | 20.0(16)  |
| C00T | 54(2)    | 62(2)    | 71(3)    | -5.8(19)  | 38.0(19) | 1.0(17)   |
| C1   | 69(9)    | 95(11)   | 94(11)   | 31(9)     | 56(8)    | 21(8)     |
| S2   | 130(18)  | 75(5)    | 97(6)    | 25(4)     | 36(7)    | 17(7)     |
| O3   | 68(7)    | 38.9(14) | 64(2)    | -5.6(12)  | 39(3)    | -5.2(17)  |
| C4   | 39(4)    | 250(40)  | 39(4)    | 17(10)    | 18(3)    | 32(9)     |

Table 4 Bond Lengths for xstr0983.

| Atom | Atom              | Length/Å   | Atom | Atom              | Length/Å  |
|------|-------------------|------------|------|-------------------|-----------|
| Zn01 | S005              | 2.3169(6)  | S008 | C00K              | 1.709(3)  |
| Zn01 | S008 <sup>1</sup> | 2.3096(7)  | S009 | C00I              | 1.706(3)  |
| Zn01 | O00D              | 2.0002(16) | S00A | Zn03 <sup>1</sup> | 2.3138(7) |
| Zn01 | O00G              | 2.470(14)  | S00A | C00J              | 1.701(3)  |
| Zn01 | O3                | 2.006(13)  | S00B | C00P              | 1.742(8)  |
| Zn02 | S005              | 2.3141(5)  | O00C | C00K              | 1.250(3)  |
| Zn02 | S007              | 2.3032(6)  | O00D | C00L              | 1.237(3)  |
| Zn02 | O00C              | 1.9882(16) | O00E | C00I              | 1.230(3)  |
| Zn02 | O00E              | 1.9972(19) | O00F | C00M              | 1.233(3)  |
| Zn03 | S005 <sup>1</sup> | 2.3354(5)  | O00G | C00P              | 1.026(13) |
| Zn03 | S006              | 2.3049(7)  | O00H | C00J              | 1.220(3)  |
| Zn03 | S00A <sup>1</sup> | 2.3137(7)  | C00I | C00O              | 1.495(3)  |
| Zn03 | O00F              | 2.0267(17) | C00J | C00N              | 1.508(3)  |
| Zn04 | S005              | 2.2944(5)  | C00K | C00R              | 1.487(4)  |
| Zn04 | S009              | 2.3029(7)  | C00L | C00Q              | 1.492(4)  |
| Zn04 | S00B              | 2.361(3)   | C00M | C00S              | 1.500(4)  |
| Zn04 | O00H              | 2.0210(19) | C00P | C00T              | 1.480(11) |
| Zn04 | S2                | 1.94(6)    | C1   | S2                | 2.24(7)   |
| S005 | Zn03 <sup>1</sup> | 2.3355(5)  | C1   | C4                | 1.61(3)   |
| S006 | C00L              | 1.716(2)   | S2   | C4                | 1.39(7)   |
| S007 | C00M              | 1.712(3)   | O3   | C4                | 1.60(6)   |
| S008 | Zn01 <sup>1</sup> | 2.3096(7)  |      |                   |           |

<sup>1</sup>3/2-X,3/2-Y,1-Z

Table 5 Bond Angles for xstr0983.

| Atom              | Atom | Atom              | Angle/°    | Atom | Atom | Atom              | Angle/°    |
|-------------------|------|-------------------|------------|------|------|-------------------|------------|
| S005              | Zn01 | O00G              | 107.88(18) | C00L | S006 | Zn03              | 97.40(8)   |
| S008 <sup>1</sup> | Zn01 | S005              | 116.95(2)  | C00M | S007 | Zn02              | 91.22(8)   |
| S008 <sup>1</sup> | Zn01 | O00G              | 114.2(2)   | C00K | S008 | Zn01 <sup>1</sup> | 90.51(8)   |
| O00D              | Zn01 | S005              | 104.50(5)  | C00I | S009 | Zn04              | 108.67(9)  |
| O00D              | Zn01 | S008 <sup>1</sup> | 118.85(5)  | C00J | S00A | Zn03 <sup>1</sup> | 108.68(8)  |
| O00D              | Zn01 | O00G              | 91.14(15)  | C00P | S00B | Zn04              | 111.8(4)   |
| O00D              | Zn01 | O3                | 97.5(3)    | C00K | O00C | Zn02              | 136.23(16) |
| O3                | Zn01 | S005              | 113.11(18) | C00L | O00D | Zn01              | 137.70(16) |
| O3                | Zn01 | S008 <sup>1</sup> | 104.4(4)   | C00I | O00E | Zn02              | 141.06(17) |
| S007              | Zn02 | S005              | 115.75(3)  | C00M | O00F | Zn03              | 138.35(18) |
| O00C              | Zn02 | S005              | 106.90(5)  | C00P | O00G | Zn01              | 113.7(10)  |
| O00C              | Zn02 | S007              | 119.40(5)  | C00J | O00H | Zn04              | 144.68(17) |
| O00C              | Zn02 | O00E              | 94.08(7)   | O00E | C00I | S009              | 127.97(19) |
| O00E              | Zn02 | S005              | 107.38(5)  | O00E | C00I | C00O              | 116.3(2)   |
| O00E              | Zn02 | S007              | 110.76(6)  | C00O | C00I | S009              | 115.7(2)   |
| S006              | Zn03 | S005 <sup>1</sup> | 113.40(2)  | O00H | C00J | S00A              | 127.36(19) |
| S006              | Zn03 | S00A <sup>1</sup> | 112.79(3)  | O00H | C00J | C00N              | 116.7(2)   |
| S00A <sup>1</sup> | Zn03 | S005 <sup>1</sup> | 114.66(3)  | C00N | C00J | S00A              | 115.96(19) |
| O00F              | Zn03 | S005 <sup>1</sup> | 101.45(5)  | O00C | C00K | S008              | 119.61(18) |
| O00F              | Zn03 | S006              | 114.48(5)  | O00C | C00K | C00R              | 120.1(3)   |
| O00F              | Zn03 | S00A <sup>1</sup> | 98.67(5)   | C00R | C00K | S008              | 120.2(2)   |
| S005              | Zn04 | S009              | 117.40(2)  | O00D | C00L | S006              | 121.38(18) |
| S005              | Zn04 | S00B              | 118.19(7)  | O00D | C00L | C00Q              | 121.0(2)   |
| S009              | Zn04 | S00B              | 108.54(6)  | C00Q | C00L | S006              | 117.7(2)   |
| O00H              | Zn04 | S005              | 108.25(5)  | O00F | C00M | S007              | 120.3(2)   |
| O00H              | Zn04 | S009              | 100.05(7)  | O00F | C00M | C00S              | 120.7(3)   |
| O00H              | Zn04 | S00B              | 101.59(10) | C00S | C00M | S007              | 119.0(2)   |
| S2                | Zn04 | S005              | 118.9(4)   | O00G | C00P | S00B              | 129.9(9)   |
| S2                | Zn04 | S009              | 110.6(7)   | O00G | C00P | C00T              | 105.7(9)   |
| S2                | Zn04 | O00H              | 97.8(7)    | C00T | C00P | S00B              | 114.3(6)   |
| Zn01              | S005 | Zn03 <sup>1</sup> | 119.43(2)  | C4   | C1   | S2                | 38(2)      |
| Zn02              | S005 | Zn01              | 119.74(2)  | C4   | S2   | Zn04              | 130(3)     |
| Zn02              | S005 | Zn03 <sup>1</sup> | 120.13(2)  | C4   | O3   | Zn01              | 126.8(14)  |
| Zn04              | S005 | Zn01              | 94.13(2)   | S2   | C4   | C1                | 96(4)      |
| Zn04              | S005 | Zn02              | 90.959(19) | S2   | C4   | O3                | 124(2)     |
| Zn04              | S005 | Zn03 <sup>1</sup> | 93.27(2)   | O3   | C4   | C1                | 140(4)     |

<sup>1</sup>3/2-X,3/2-Y,1-Z

Table 6 Torsion Angles for xstr0983.

| A                 | B    | C    | D    | Angle/°    | A                 | B    | C    | D    | Angle/°    |
|-------------------|------|------|------|------------|-------------------|------|------|------|------------|
| Zn01 <sup>1</sup> | S008 | C00K | O00C | -3.1(2)    | Zn03              | S006 | C00L | C00Q | 169.8(3)   |
| Zn01 <sup>1</sup> | S008 | C00K | C00R | 178.6(3)   | Zn03 <sup>1</sup> | S00A | C00J | O00H | -2.0(3)    |
| Zn01              | O00D | C00L | S006 | 158.64(14) | Zn03 <sup>1</sup> | S00A | C00J | C00N | 178.36(17) |

|      |      |      |      |            |      |      |      |      |             |
|------|------|------|------|------------|------|------|------|------|-------------|
| Zn01 | O00D | C00L | C00Q | -21.2(4)   | Zn03 | O00F | C00M | S007 | -169.83(13) |
| Zn01 | O00G | C00P | S00B | -68.8(15)  | Zn03 | O00F | C00M | C00S | 7.9(5)      |
| Zn01 | O00G | C00P | C00T | 148.7(5)   | Zn04 | S009 | C00I | O00E | -10.0(3)    |
| Zn01 | O3   | C4   | C1   | 175.6(15)  | Zn04 | S009 | C00I | C00O | 170.05(18)  |
| Zn01 | O3   | C4   | S2   | 2(2)       | Zn04 | S00B | C00P | O00G | 45.1(16)    |
| Zn02 | S007 | C00M | O00F | 8.4(2)     | Zn04 | S00B | C00P | C00T | -175.0(5)   |
| Zn02 | S007 | C00M | C00S | -169.4(3)  | Zn04 | O00H | C00J | S00A | -7.9(5)     |
| Zn02 | O00C | C00K | S008 | 167.23(13) | Zn04 | O00H | C00J | C00N | 171.7(3)    |
| Zn02 | O00C | C00K | C00R | -14.5(4)   | Zn04 | S2   | C4   | C1   | 170(2)      |
| Zn02 | O00E | C00I | S009 | 3.4(4)     | Zn04 | S2   | C4   | O3   | -14(3)      |
| Zn02 | O00E | C00I | C00O | -176.7(2)  | S2   | C1   | C4   | O3   | -175(3)     |
| Zn03 | S006 | C00L | O00D | -10.0(2)   |      |      |      |      |             |

$1/2-X, 3/2-Y, 1-Z$

Table 7 Hydrogen Atom Coordinates ( $\text{\AA} \times 10^4$ ) and Isotropic Displacement Parameters ( $\text{\AA}^2 \times 10^3$ ) for xstr0983.

| Atom | x    | y    | z     | U(eq) |
|------|------|------|-------|-------|
| H00A | 8780 | 6020 | 10386 | 80    |
| H00B | 8182 | 5676 | 10394 | 80    |
| H00C | 8227 | 6368 | 10641 | 80    |
| H00D | 6963 | 4635 | 4454  | 86    |
| H00E | 6273 | 4717 | 3989  | 86    |
| H00F | 6506 | 4417 | 5160  | 86    |
| H00G | 7360 | 9293 | 7372  | 120   |
| H00H | 6679 | 9258 | 7410  | 120   |
| H00I | 6911 | 9775 | 6743  | 120   |
| H00J | 5771 | 6794 | 1926  | 116   |
| H00K | 6004 | 6129 | 2066  | 116   |
| H00L | 5999 | 6478 | 951   | 116   |
| H00M | 4955 | 8101 | 3906  | 139   |
| H00N | 5458 | 8552 | 3742  | 139   |
| H00O | 5397 | 8370 | 4950  | 139   |
| H00P | 5326 | 7311 | 8713  | 88    |
| H00Q | 5489 | 7976 | 8474  | 88    |
| H00R | 5829 | 7650 | 9561  | 88    |
| H1A  | 5204 | 6807 | 8114  | 121   |
| H1B  | 5441 | 7232 | 9134  | 121   |
| H1C  | 5670 | 6567 | 9152  | 121   |

Table 8 Atomic Occupancy for xstr0983.

| Atom | Occupancy | Atom | Occupancy | Atom | Occupancy |
|------|-----------|------|-----------|------|-----------|
| S00B | 0.68(4)   | O00G | 0.40(4)   | C00P | 0.51(6)   |

C00T 0.764(10) H00P 0.764(10) H00Q 0.764(10)  
H00R 0.764(10) C1 0.251(11) H1A 0.251(11)  
H1B 0.251(11) H1C 0.251(11) S2 0.21(4)  
O3 0.85(4) C4 0.57(7)

Refinement model description

Number of restraints - 0, number of constraints - unknown.

Details:

1. Fixed Uiso

At 1.5 times of:

All C(H,H,H) groups

2. Others

Sof(C00T)=Sof(H00P)=Sof(H00Q)=Sof(H00R)=FVAR(1)

Sof(C1)=Sof(H1A)=Sof(H1B)=Sof(H1C)=FVAR(2)

3.a Idealised Me refined as rotating group:

C00N(H00A,H00B,H00C), C00O(H00D,H00E,H00F), C00Q(H00G,H00H,H00I), C00R(H00J,  
H00K,H00L), C00S(H00M,H00N,H00O), C00T(H00P,H00Q,H00R), C1(H1A,H1B,H1C)

S3. TGA of 1

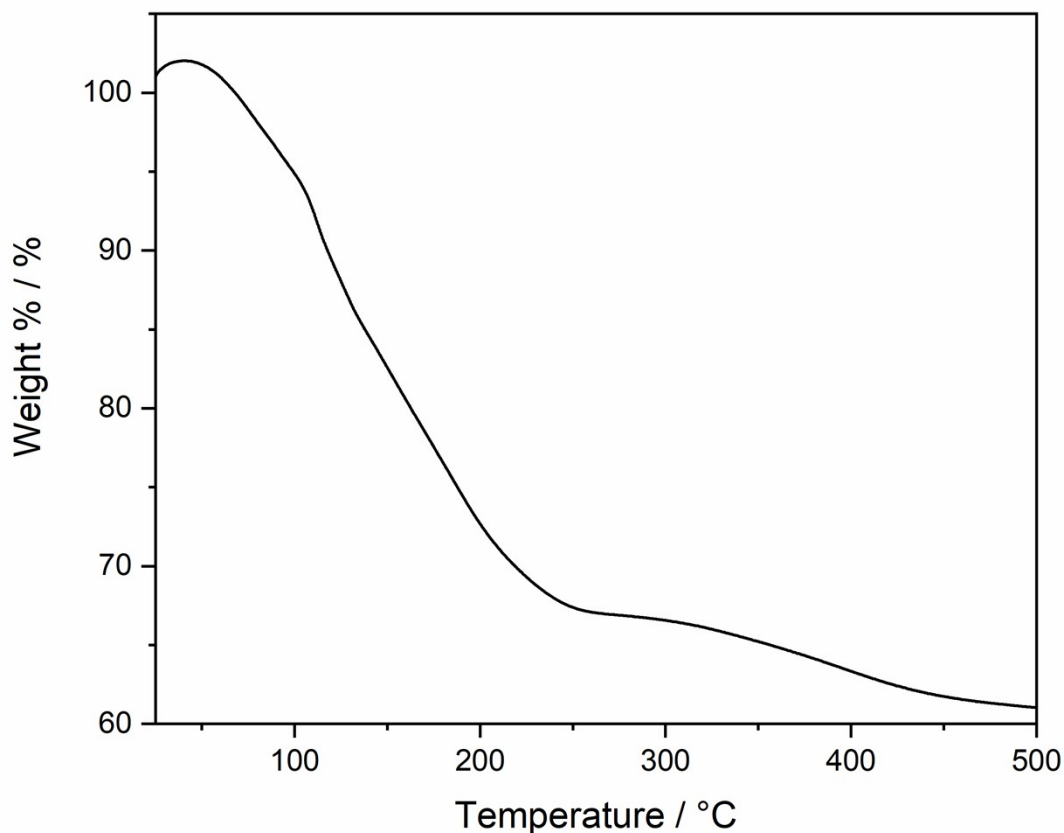

S4. AACVD of Zn(O,S) using alternative known precursors

Zinc acetate dihydrate and zinc diethyldithiocarbamate were added to an AACVD bubbler dissolved in methanol (20 cm<sup>3</sup>) and THF (20 cm<sup>3</sup>) respectively using the amounts listed in the table below. AACVD was carried out at 450 °C with a flow rate of 0.5 Lmin<sup>-1</sup>.

| Amount of zinc acetate dihydrate / g | Amount of zinc diethyldithiocarbamate / g |
|--------------------------------------|-------------------------------------------|
| 0 (0 mmol)                           | 0.7239 (2 mmol)                           |
| 0.0439 (0.2 mmol)                    | 0.6515 (1.8 mmol)                         |
| 0.0878 (0.4 mmol)                    | 0.5791 (1.6 mmol)                         |
| 0.1317 (0.6 mmol)                    | 0.5067 (1.4 mmol)                         |
| 0.1756 (0.8 mmol)                    | 0.4343 (1.2 mmol)                         |
| 0.2195 (1.0 mmol)                    | 0.3619 (1.0 mmol)                         |
| 0.2634 (1.2 mmol)                    | 0.2895 (0.8 mmol)                         |
| 0.3073 (1.4 mmol)                    | 0.2172 (0.6 mmol)                         |
| 0.3512 (1.6 mmol)                    | 0.1448 (0.4 mmol)                         |
| 0.3951 (1.8 mmol)                    | 0.0724 (0.2 mmol)                         |
| 0.4390 (2.0 mmol)                    | 0 (0 mmol)                                |



S5. XRD pattern of ZnS deposited from **1**

AACVD of **1** carried out in toluene at 500 °C with a flow rate of 0.5 Lmin<sup>-1</sup>.

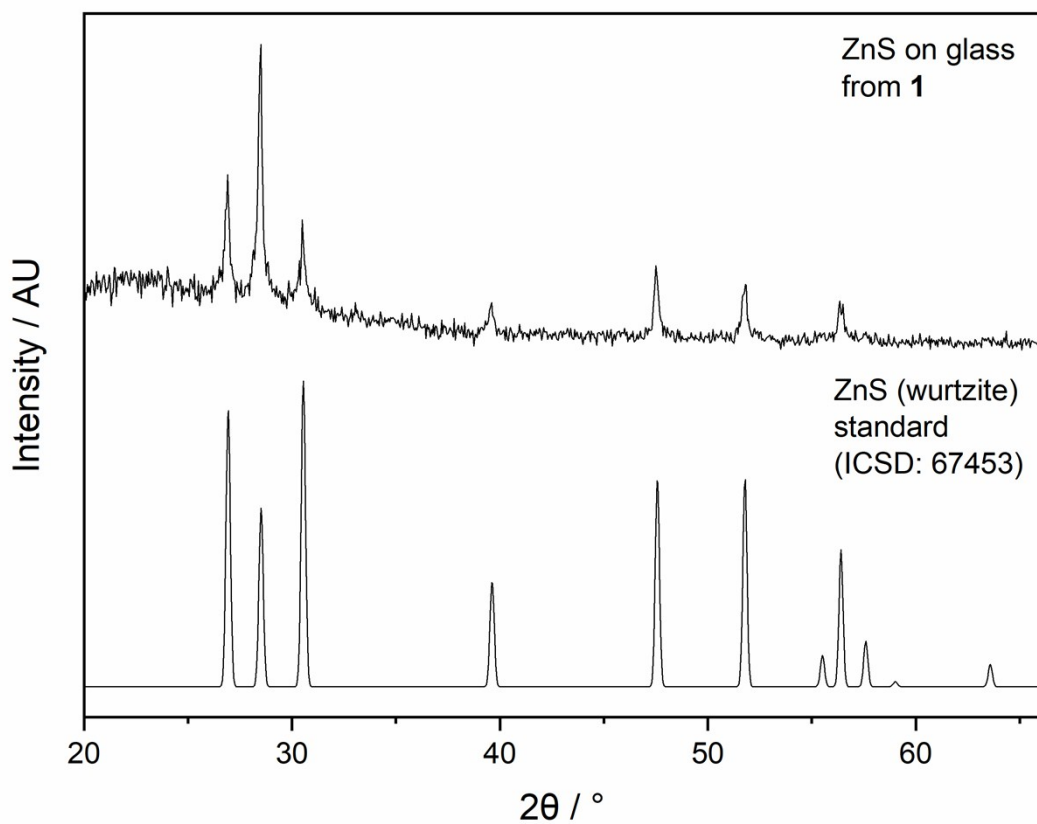

S6. XPS (300 s etch): O 1s spectrum of ZnO<sub>0.884</sub>S<sub>0.116</sub>

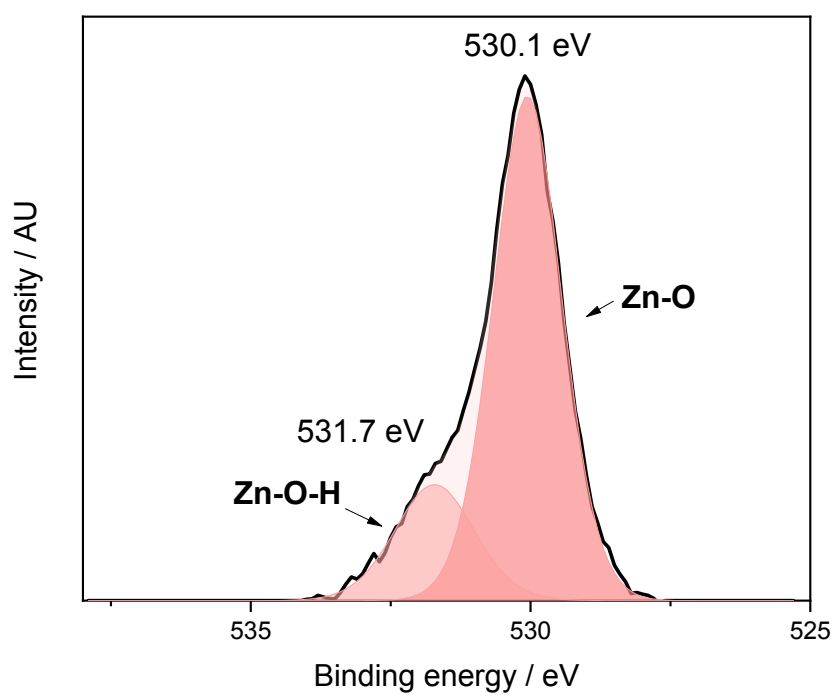

## S7. XRD patterns of large area film

From bottom to top A1–A4, B1–B4, C1–C4, D1–D4, E1–E4.

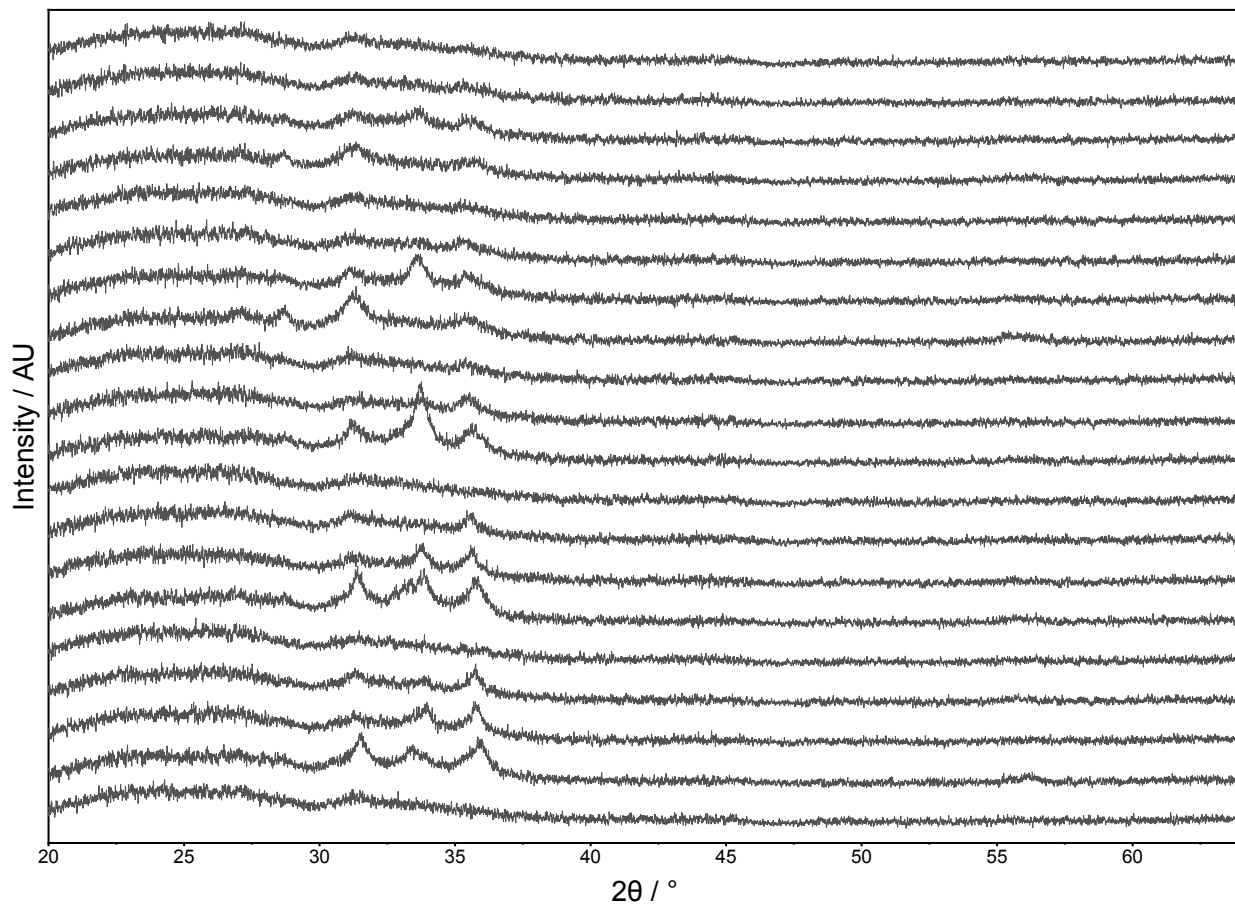

S8. EDAX raw data of large area film

| Position | O     | S    | Zn    | Total | S/Zn        |
|----------|-------|------|-------|-------|-------------|
| A4       | 66.73 | 2.66 | 30.61 | 100   | 0.086899706 |
| A3       | 57.69 | 3.83 | 38.48 | 100   | 0.099532225 |
| A2       | 48.53 | 4.79 | 46.68 | 100   | 0.102613539 |
| A1       | 47.98 | 3.37 | 48.65 | 100   | 0.069270298 |
| B1       | 27.14 | 7.09 | 65.77 | 100   | 0.107799909 |
| B2       | 40.89 | 6.14 | 52.97 | 100   | 0.115914669 |
| B3       | 62.24 | 4.36 | 33.4  | 100   | 0.130538922 |
| B4       | 70.98 | 4.23 | 24.79 | 100   | 0.17063332  |
| C1       | 25.21 | 8.36 | 66.42 | 100   | 0.125865703 |
| C2       | 31.45 | 7.86 | 60.69 | 100   | 0.129510628 |
| C3       | 68.75 | 4.79 | 26.46 | 100   | 0.181027967 |
| C4       | 75.35 | 4.49 | 20.16 | 100   | 0.222718254 |
| D1       | 28.06 | 9.09 | 62.84 | 100   | 0.144653087 |
| D2       | 40.04 | 7.62 | 52.34 | 100   | 0.145586549 |
| D3       | 73.06 | 4.75 | 22.2  | 100   | 0.213963964 |
| D4       | 77.29 | 4.2  | 18.51 | 100   | 0.226904376 |
| E1       | 39.87 | 7.74 | 52.38 | 100   | 0.147766323 |
| E2       | 62.88 | 4.99 | 32.13 | 100   | 0.155306567 |
| E3       | 77.02 | 3.82 | 19.17 | 100   | 0.199269692 |
| E4       | 79.97 | 3.68 | 16.35 | 100   | 0.225076453 |

S9. UV/vis transmittance spectra of large area film

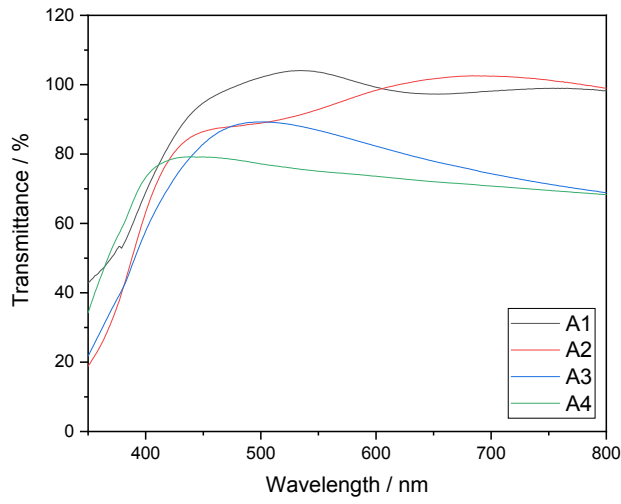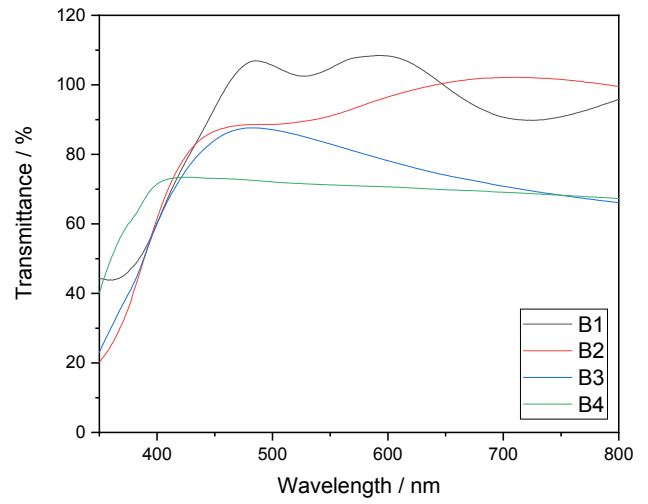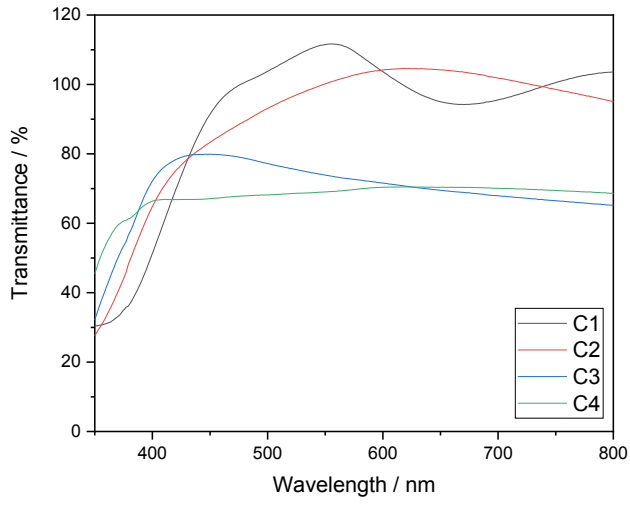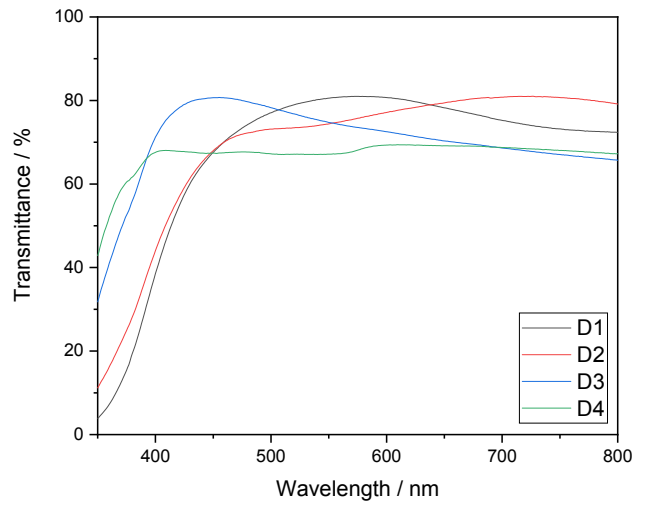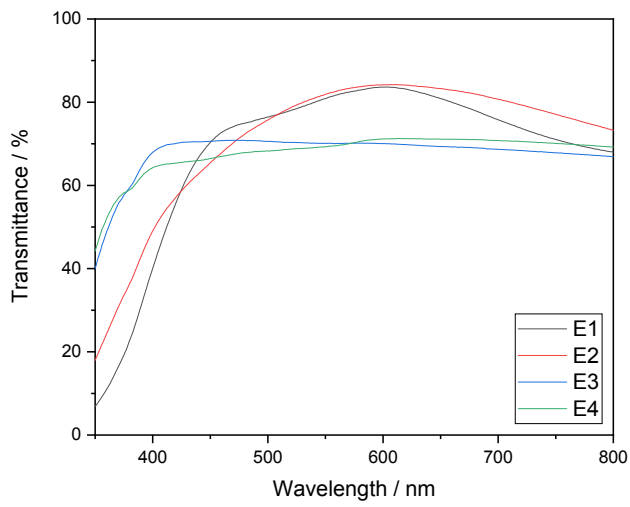

Supplement: d0tc00840k1.pdf [file d0tc00840k1.pdf]
